# Supplementary material for: Diversity and distribution of genetic variation in gammarids: Comparing patterns between invasive and non‐invasive species
Source: PubMed Central journal article supplement (PMC5632605; doi:10.1002/ece3.3208), 2017-08-22

f)

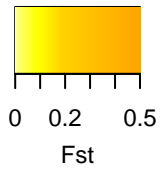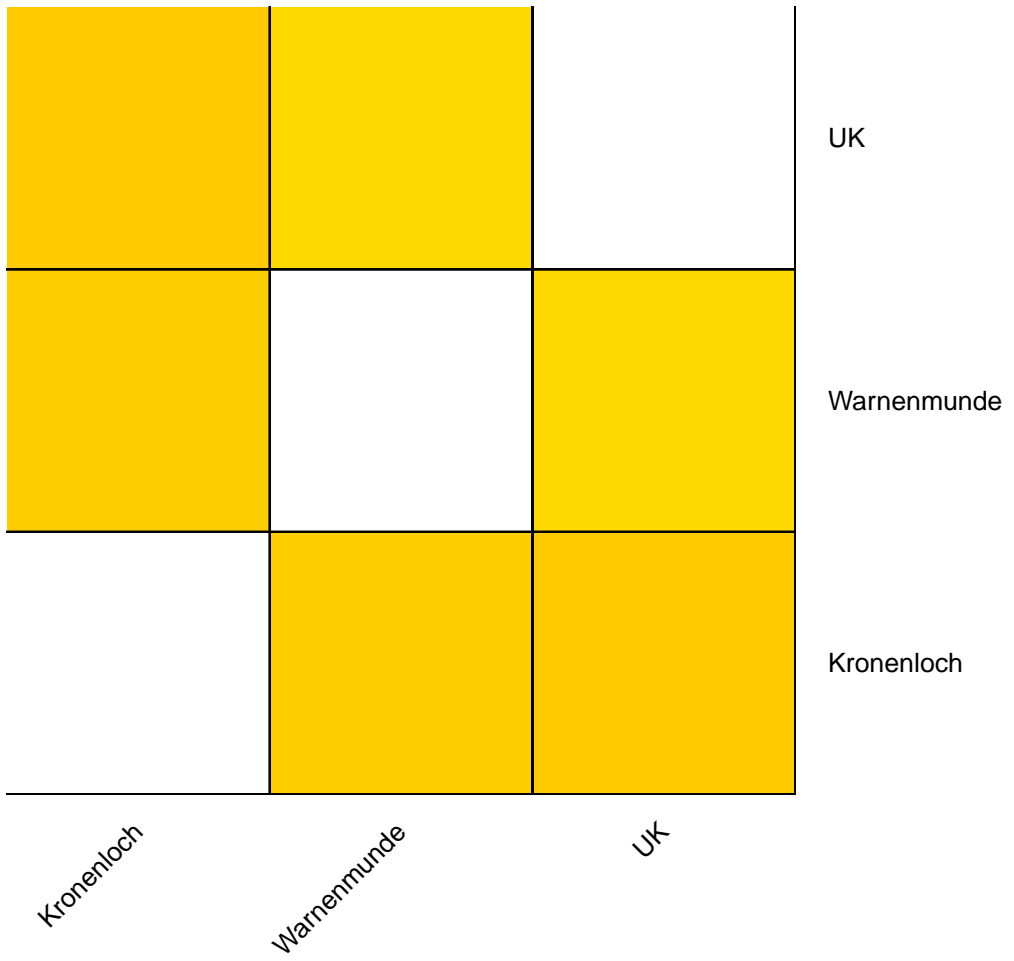

Supplement: ECE3-7-7687-s007.pdf [file ECE3-7-7687-s007.pdf]
